# Supplementary material for: Analysis of heterogeneity in T2-weighted MR images can differentiate pseudoprogression from progression in glioblastoma
Source: PubMed Central journal article supplement (PMC5435159; doi:10.1371/journal.pone.0176528), 2017-05-17
Supplement: pone.0176528.s001.pdf [file pone.0176528.s001.pdf]

**a**

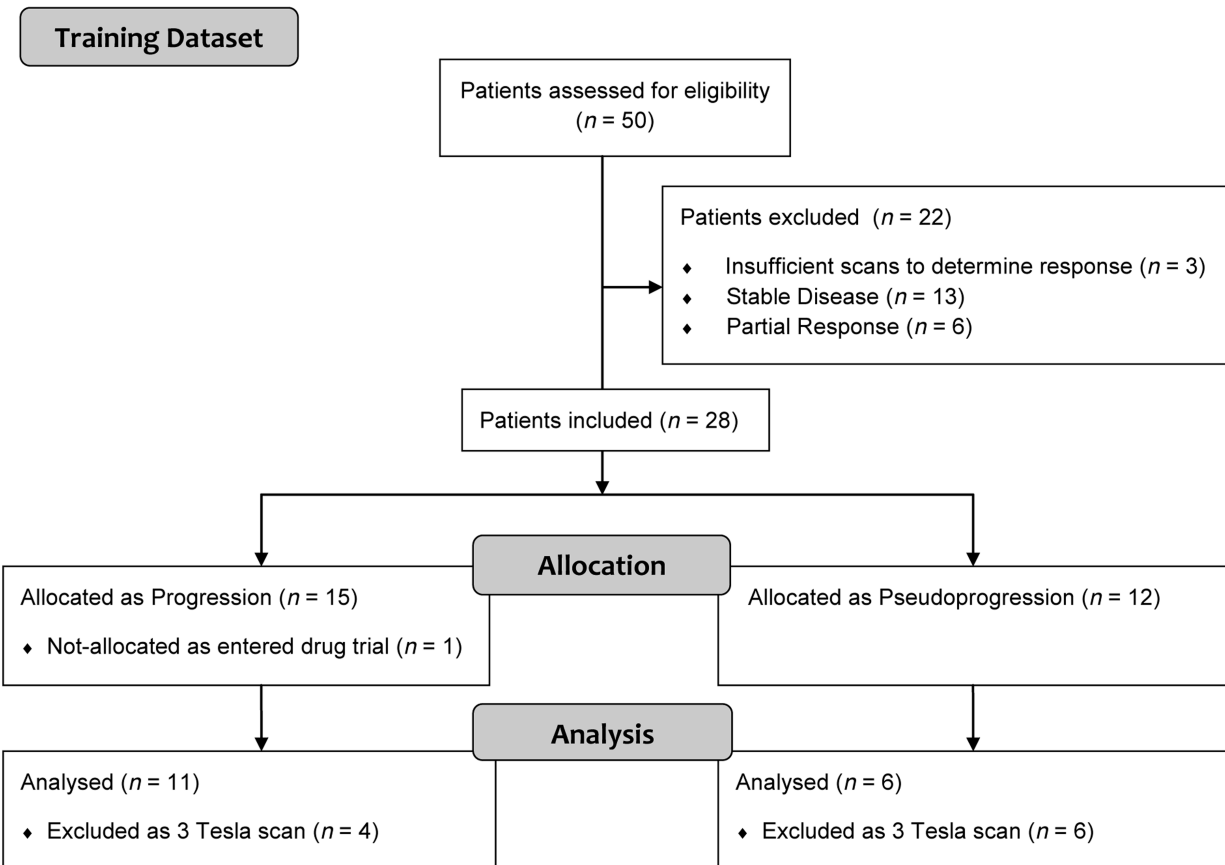

**b**

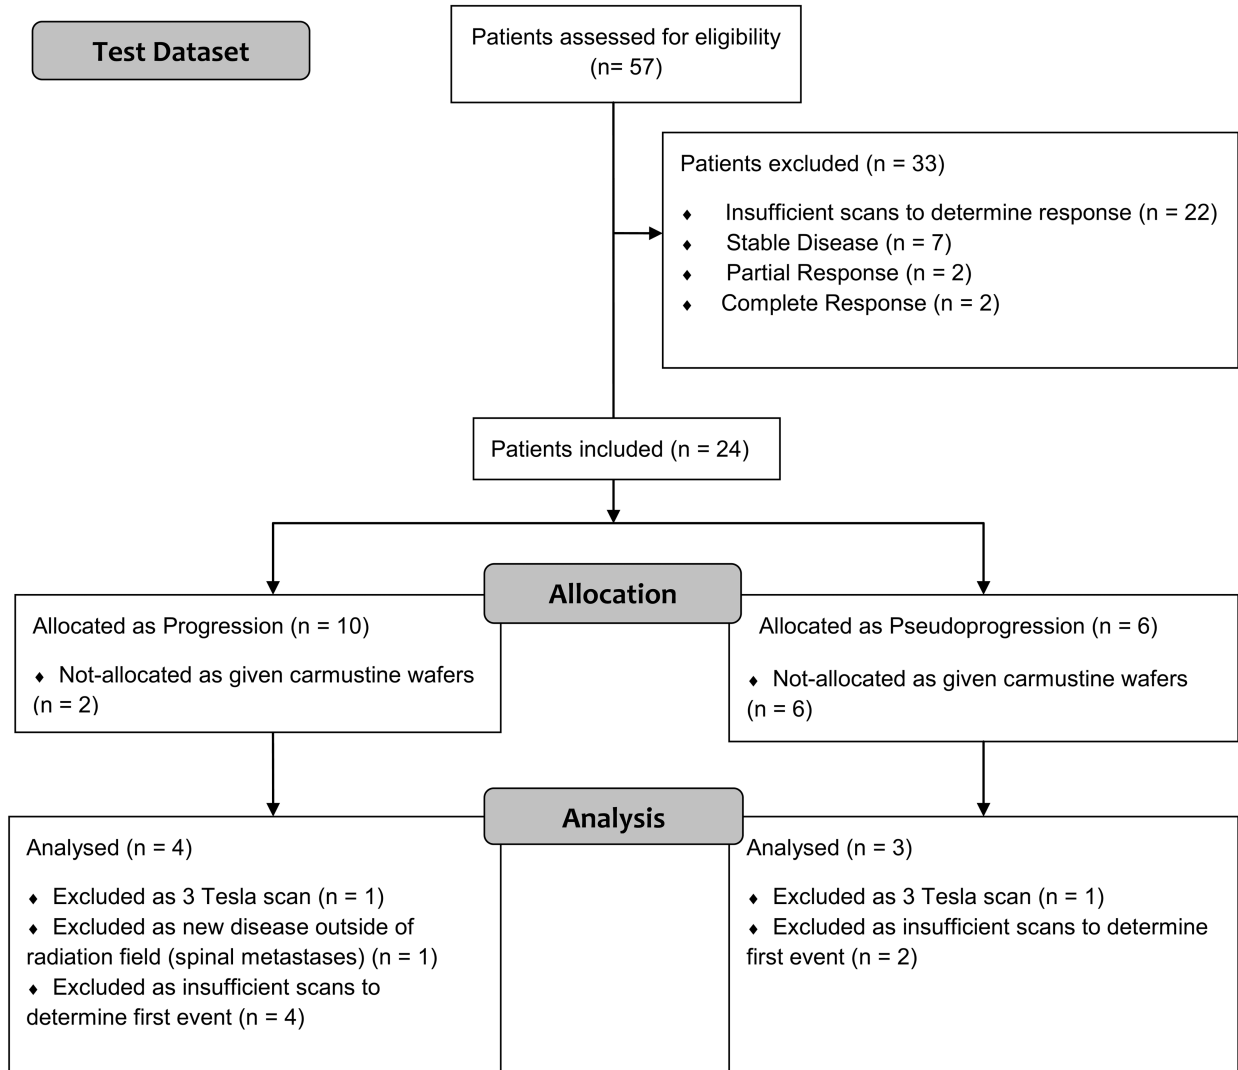

**c**

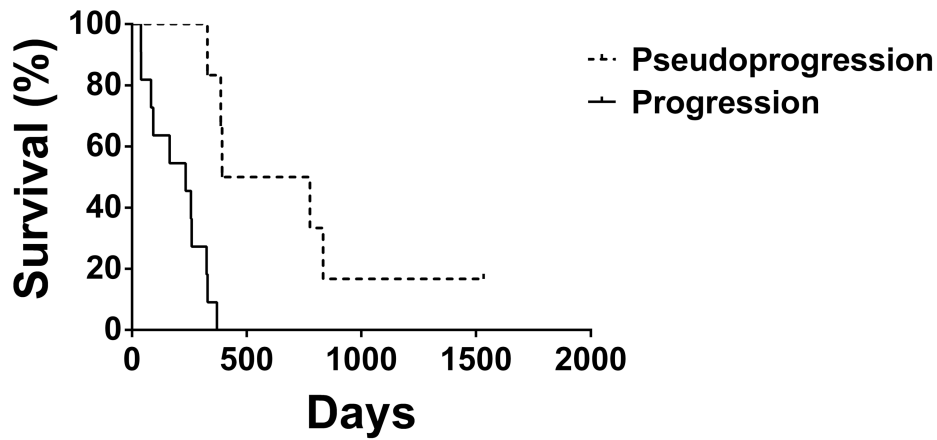

**S1 Fig. Retrospective training dataset.** Modified CONSORT flow diagrams of patient inclusion and exclusion criteria for the retrospective training data set (a) and prospective test data set (b). (c) Kaplan-Meier survival curve for patients with progression ( $n = 11$ ) and pseudoprogession ( $n = 6$ ). The median survival was 234 days (range 39 - 370) for those with progression and 585 (329 – 1533) for those with pseudoprogession (with one censored patient surviving).
