# Supplementary material for: Analysis of heterogeneity in T2-weighted MR images can differentiate pseudoprogression from progression in glioblastoma
Source: PubMed Central journal article supplement (PMC5435159; doi:10.1371/journal.pone.0176528), 2017-05-17
Supplement: pone.0176528.s002.pdf [file pone.0176528.s002.pdf]

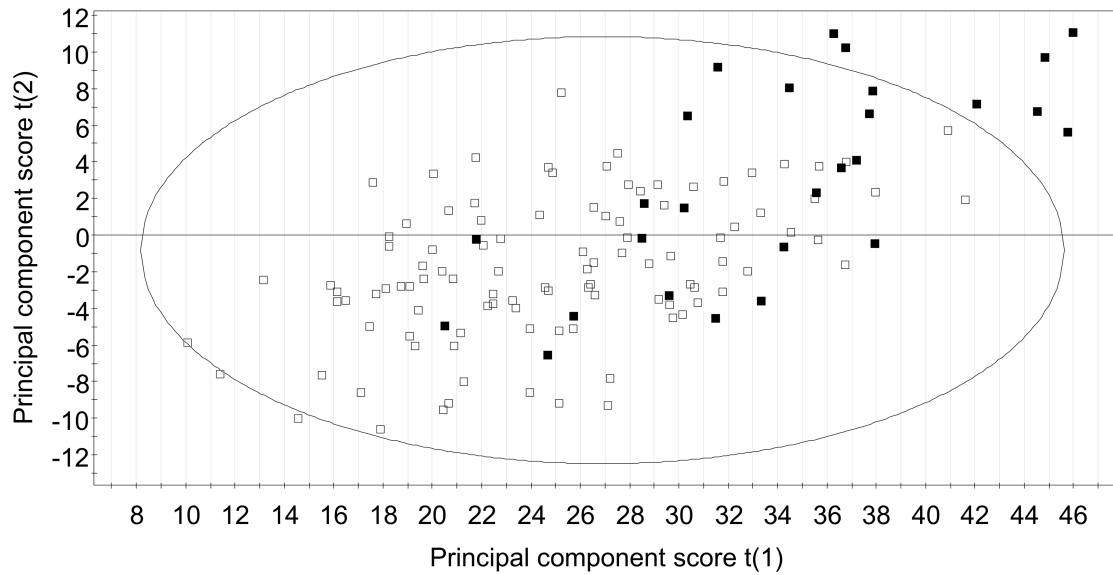

**S2 Fig. Principle component analysis of image heterogeneity.** Principal component score plot of normalized perimeter MFs from all four time points showing scans performed at 3 T (filled squares) and 1.5 T (empty squares). The modeled data were not scaled or centered. The displayed T2 Hotelling's tolerance ellipse was set at the 0.05 significance level.
